# Supplementary material
Source: Springer Nature journal article supplement (https://www.springermedizin.de/resource/supplementary/13075_2010_3101_MOESM9_ESM.pdf/9693738)

**a**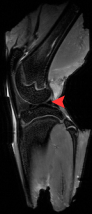**b**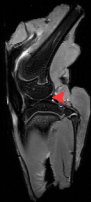**c**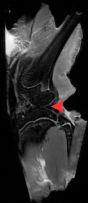**d**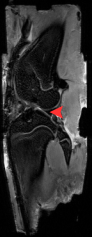**e**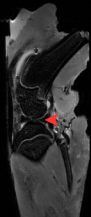**f**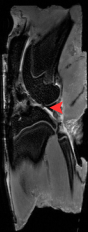

Supplement: MOESM9 [file 9693738]
